# Supplementary material for: Experimentally informed structure optimization of amorphous TiO2 films grown by atomic layer deposition
Source: Royal Society of Chemistry journal article supplement (doi:10.1039/d2nr03614b), 2022-12-05
Supplement: d2nr03614b1.pdf [file d2nr03614b1.pdf]

# Experimentally informed structure optimization of amorphous TiO<sub>2</sub> films grown by atomic layer deposition

*Jun Meng<sup>1†</sup>, Mehrdad Abbasi<sup>2†</sup>, Yutao Dong<sup>1</sup>, Corey Carlos<sup>1</sup>, Xudong Wang<sup>1</sup>, Jinwoo Hwang<sup>2\*</sup>,  
Dane Morgan<sup>1\*</sup>*

<sup>1</sup>Department of Materials Science and Engineering, University of Wisconsin-Madison, Madison,  
WI 53706, United States

<sup>2</sup>Department of Materials Science and Engineering, The Ohio State University, Columbus, Ohio  
43210, United States

KEYWORDS: Amorphous titanium dioxide, photoelectrochemical, medium range ordering,  
structure optimization

### XPS spectrums of free-standing TiO<sub>2</sub> film

Ti 2p core spectra was fitted with two peaks located at 458.4 eV and 464.2 eV corresponding to Ti 2p<sub>3/2</sub> and Ti 2p<sub>1/2</sub> with 5.8 eV peak separation which implied +4 valence for Ti. O 1s spectra showed the peak at 529.9 eV regarded as Ti-O bonds in TiO<sub>2</sub>. Through the surface quantitative analysis on the integration of fitting peaks divided by the relative sensitive factor, the O/Ti ratio value was about 1.91, indicating stoichiometry TiO<sub>2</sub> with tiny oxygen vacancy.

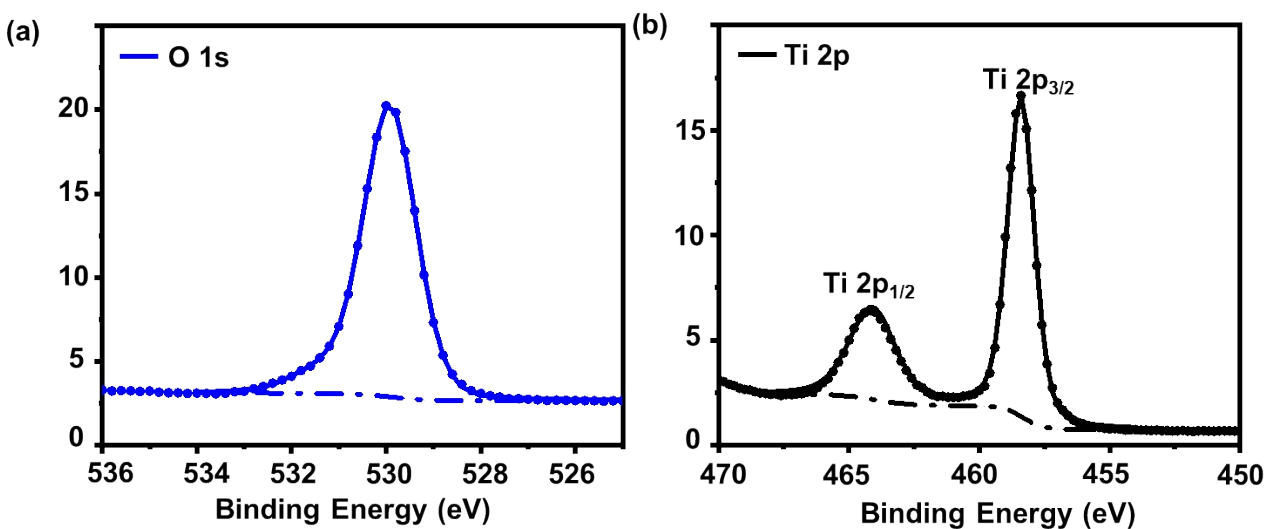

**Figure S1.** XPS spectrums of free-standing TiO<sub>2</sub> film grown under 100°C. a, O 1s core spectra. b, Ti 2p core spectra.

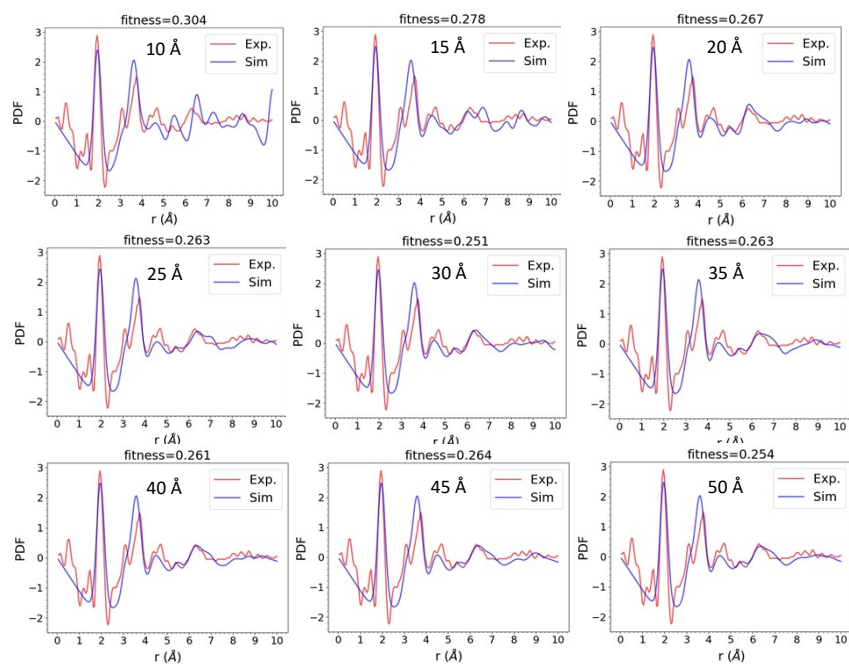

**Figure S2.** Simulated  $G(r)$  of melt-quenched a-TiO<sub>2</sub> model with different size.

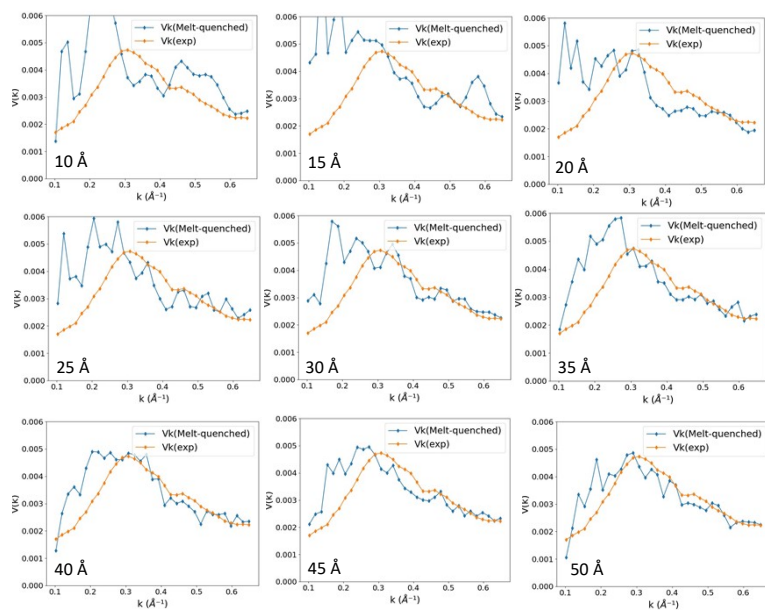

**Figure S3.** Simulated  $V(k)$  of melt-quenched a-TiO<sub>2</sub> model with different size.
